# Supplementary material
Source: publisher site journal article supplement (https://www.dovepress.com/get_supplementary_file.php?f=325235.xlsx)
Supplement: Supplementary file 1 [file get_supplementary_file.php]

## Sheet: Read code MD
GROUP_NAME	CODE_VALUE	CODE_NAME
ADHD	6A61.	ADHD annual review
ADHD	8BPT.	Drug therapy for ADHD
ADHD	8BPT0	Stimulant drug therapy ADHD
ADHD	8BPT1	Non-stimulnt drug therapy ADHD
ADHD	9Ngp.	On drug therapy ADHD
ADHD	9Ngp0	On stimulant drug therapy ADHD
ADHD	9Ngp1	On non-stimulnt drug ther ADHD
ADHD	9Ol8.	ADHD monitr invitatn 1st lettr
ADHD	9Ol9.	ADHD monitr invitatn 2nd lettr
ADHD	9OlA.	ADHD monitr invitatn 3rd lettr
ADHD	E2E..	Childhood hyperkinetic syndr.
ADHD	E2E0.	Child attention deficit disord
ADHD	E2E00	Attention deficit-not hyperact
ADHD	E2E01	Attention deficit +hyperactive
ADHD	E2E0z	Child attent.deficit dis.NOS
ADHD	E2E1.	Hyperkinesis+development delay
ADHD	E2E2.	Hyperkinetic conduct disorder
ADHD	E2Ey.	Other hyperkinetic manifestat.
ADHD	E2Ez.	Hyperkinetic syndrome NOS
ADHD	Eu90.	[X]Hyperkinetic disorders
ADHD	Eu900	[X]Disturbance activity/attntn
ADHD	Eu901	[X]Hyperkinetic conduct disord
ADHD	Eu902	[X]Def atten motor cont percep
ADHD	Eu90y	[X]Oth hyperkinetic disorders
ADHD	Eu90z	[X]Hyperkinetic disorder, unsp
ADHD	Eu9y7	[X]Attention deficit disorder
ANX	2258.	O/E - anxious
ANX	2259.	O/E - nervous
ANX	1B12.	Nerves - nervousness
ANX	1B13.	Anxiousness
ANX	1B1V.	C/O - panic attack
ANX	225J.	O/E - panic attack
ANX	8G52.	Antiphobic therapy
ANX	8G94.	Anxiety management training
ANX	8HHp.	Ref guid self-help for anxiety
ANX	E200.	Anxiety states
ANX	E2000	Anxiety state unspecified
ANX	E2001	Panic disorder
ANX	E2002	Generalised anxiety disorder
ANX	E2003	Anxiety with depression
ANX	E2004	Chronic anxiety
ANX	E2005	Recurrent anxiety
ANX	E200z	Anxiety state NOS
ANX	E202.	Phobic disorders
ANX	E2020	Phobia unspecified
ANX	E2021	Agoraphobia with panic attacks
ANX	E2022	Agoraphobia - no panic attacks
ANX	E2023	Social phobia-eating in public
ANX	E2024	Social phobia-public speaking
ANX	E2025	Social phobia-public washing
ANX	E2026	Acrophobia
ANX	E2027	Animal phobia
ANX	E2028	Claustrophobia
ANX	E2029	Fear of crowds
ANX	E202A	Fear of flying
ANX	E202B	Cancer phobia
ANX	E202C	Dental phobia
ANX	E202D	Fear of death
ANX	E202E	Fear of pregnancy
ANX	E202z	Phobic disorder NOS
ANX	E203.	Obsessive-compulsive disorders
ANX	E2030	Compulsive neurosis
ANX	E2031	Obsessional neurosis
ANX	E203z	Obsessive-compulsive dis NOS
ANX	E28z.	Acute stress reaction NOS
ANX	E2920	Separation anxiety disorder
ANX	E2D0.	Anxiety/fear child/adoles.dis.
ANX	E2D00	Child/adolesc.overanxious.dis.
ANX	E2D01	Child/adolesc.fearfulness dis.
ANX	E2D0z	Anxiety/fear child/adolesc.NOS
ANX	Eu40.	[X]Phobic anxiety disorders
ANX	Eu400	[X]Agoraphobia
ANX	Eu401	[X]Social phobias
ANX	Eu402	[X]Specific (isolated) phobia
ANX	Eu403	[X]Needle phobia
ANX	Eu40y	[X]Other phobic anxiety disord
ANX	Eu40z	[X]Phobic anxiety disordr unsp
ANX	Eu41.	[X]Other anxiety disorders
ANX	Eu410	[X]Panic episodic paroxysm anx
ANX	Eu411	[X]Generalized anxiety disord
ANX	Eu412	[X]Mixed anxiety/depressve dis
ANX	Eu413	[X]Other mixed anxiety disord
ANX	Eu41y	[X]Other specif anxiety disord
ANX	Eu41z	[X]Anxiety disord unspecified
ANX	Eu42.	[X]Obsessive - compulsive dis
ANX	Eu420	[X]Predom obsessional thoughts
ANX	Eu421	[X]Predom compuls acts/ritual
ANX	Eu422	[X]Mixed obsess thoughts/acts
ANX	Eu42y	[X]Oth obsessve-compulsve dis
ANX	Eu42z	[X]Obsessve-complsve dis unsp
ANX	Eu930	[X]Separ anxiety dis childhood
ANX	Eu931	[X]Phobic anxiet dis childhood
ANX	Eu932	[X]Social anx dis childhood
ANX	R2y2.	[D]Nervousness
ASD	1J9..	Suspected autism
ASD	E140.	Infantile autism
ASD	E1400	Infantile autism - active
ASD	E1401	Infantile autism - residual
ASD	E140z	Infantile autism NOS
ASD	Eu84.	[X]Pervasive development dis
ASD	Eu840	[X]Childhood autism
ASD	Eu841	[X]Atypical autism
ASD	Eu842	[X]Rett's syndrome
ASD	Eu843	[X]Oth child disintegrat dis
ASD	Eu844	[X]Overact+retard+stereotyp mv
ASD	Eu845	[X]Asperger's syndrome
ASD	Eu846	Pathological demand avoidance
ASD	Eu84y	[X]Oth pervasive develop dis
ASD	Eu84z	[X]Pervasve develop dis unsp
CON	E2C..	Disturbance of conduct NEC
CON	E2C0.	Aggress.unsocial conduct dis.
CON	E2C0z	Aggressive unsocial disord.NOS
CON	E2C1.	Nonaggr.unsocial conduct dis.
CON	E2C10	Unsocial childhood truancy
CON	E2C1z	Nonaggr.unsocial cond.dis.NOS
CON	E2C2.	Socialised conduct disorder
CON	E2C20	Socialised childhood truancy
CON	E2C2z	Socialised conduct disord. NOS
CON	E2C4.	Mixed conduct/emotion disturb.
CON	E2C4z	Mixed conduct/emotion dist.NOS
CON	E2Cy.	Other conduct disturbances
CON	E2Cyz	Other conduct disturbances NOS
CON	E2Cz.	Disturbance of conduct unspec.
CON	E2Czz	Conduct disturbance NOS
CON	E2Dy0	Childhood oppositional disord.
CON	E2E2.	Hyperkinetic conduct disorder
CON	Eu901	[X]Hyperkinetic conduct disord
CON	Eu91.	[X]Conduct disorders
CON	Eu910	[X]Conduct dis family context
CON	Eu911	[X]Unsocialized conduct disord
CON	Eu912	[X]Socialized conduct disorder
CON	Eu913	[X]Oppositional defiant disord
CON	Eu91y	[X]Other conduct disorders
CON	Eu91z	[X]Conduct disorder, unspecif
CON	Eu92.	[X]Mixed dis conduct/emotion
CON	Eu920	[X]Depressive conduct disorder
CON	Eu92y	[X]Oth mix disord conduct/emot
CON	Eu92z	[X]Mixed dis conduct/emot unsp
DEP	2257.	O/E - depressed
DEP	1B17.	Depressed
DEP	1B1U.	Symptoms of depression
DEP	1BP..	Loss of interest
DEP	1BP0.	Loss of inter prev enjoy activ
DEP	1BQ..	Loss of capacity for enjoyment
DEP	1BT..	Depressed mood
DEP	1BU..	Loss of hope for the future
DEP	E112.	Single major depressive episod
DEP	E1120	Single major depression-unspec
DEP	E1121	Single major depression-mild
DEP	E1122	Single major depress.-moderate
DEP	E1123	Single major depression-severe
DEP	E1125	Single maj.depres.-part remiss
DEP	E1126	Single maj.depres.-full remiss
DEP	E112z	Single major depression NOS
DEP	E113.	Recurrent major depressive epi
DEP	E1130	Recurr.major depression-unspec
DEP	E1131	Recurr.major depression-mild
DEP	E1132	Recurr.major depress.-moderate
DEP	E1133	Recurr.major depression-severe
DEP	E1135	Recurr.maj.depres.-part remiss
DEP	E1136	Recurr.maj.depres.-full remiss
DEP	E1137	Recurrent depression
DEP	E113z	Recurr. major depression NOS
DEP	E118.	Seasonal affective disorder
DEP	E135.	Agitated depression
DEP	E2003	Anxiety with depression
DEP	E204.	Neurotic (reactive) depression
DEP	E291.	Prolonged depressive reaction
DEP	E2B..	Depressive disorder NEC
DEP	E2B0.	Postviral depression
DEP	E2B1.	Chronic depression
DEP	Eu32.	[X]Depressive episode
DEP	Eu320	[X]Mild depressive episode
DEP	Eu321	[X]Moderate depressve episode
DEP	Eu322	[X]Severe depressiv no psychot
DEP	Eu324	[X]Mild depression
DEP	Eu325	[X]Major depression, mild
DEP	Eu326	[X]Major depression, moder sev
DEP	Eu327	[X]Maj dep, sev wthout psy sym
DEP	Eu32B	[X]Antenatal depression
DEP	Eu32y	[X]Other depressive episodes
DEP	Eu32z	[X]Depressive episode, unspecf
DEP	Eu33.	[X]Recurrent depressive disord
DEP	Eu330	[X]Recurr depress current mild
DEP	Eu331	[X]Recurr depress current mod
DEP	Eu332	[X]Recurr dep now sever no psy
DEP	Eu334	[X]Recurr depress in remission
DEP	Eu33y	[X]Oth recurr depressve disord
DEP	Eu33z	[X]Recurrent depress dis unsp
DEP	Eu341	[X]Dysthymia
DEP	Eu412	[X]Mixed anxiety/depressve dis
EAT	1467.	H/O: anorexia nervosa
EAT	1612.	Appetite loss - anorexia
EAT	1FF..	Binge eating
EAT	8HTN.	Refer eating disorders clinic
EAT	9Nk9.	Seen in eating disorder clinic
EAT	E271.	Anorexia nervosa
EAT	E275.	Other non-organic eating dis.
EAT	E2750	Non-organic eating dis.unspec.
EAT	E2751	Bulimia (non-org. overeating)
EAT	E275y	Non-organic eating disord. OS
EAT	E275z	Non-organic eating disord. NOS
EAT	Eu50.	[X]Eating disorders
EAT	Eu500	[X]Anorexia nervosa
EAT	Eu501	[X]Atypical anorexia nervosa
EAT	Eu502	[X]Bulimia nervosa
EAT	Eu503	[X]Atypical bulimia nervosa
EAT	Eu504	[X]Overeat + oth psychol dist
EAT	Eu50y	[X]Other eating disorders
EAT	Eu50z	[X]Eating disorder unspecified
EAT	R030.	[D]Anorexia
EAT	R030z	[D]Anorexia NOS
EAT	R0360	[D]Excessive eating
DEV	2B5..	O/E - symbolic dysfunction
DEV	2B55.	O/E - dyslexia
DEV	8E23.	Dyslexia training
DEV	E2F02	Developmental dyslexia
DEV	Eu80.	[X]Spec develop dis speech/lan
DEV	Eu800	[X]Specif speech articulat dis
DEV	Eu801	[X]Expressive language disordr
DEV	Eu80z	[X]Dev disord speech/lang unsp
DEV	Eu81.	[X]Specif scholastic devel dis
DEV	Eu810	[X]Specific reading disorder
DEV	Eu811	[X]Specific spelling disorder
DEV	Eu812	[X]Specific disord arithmetic
DEV	Eu813	[X]Mixed scholastic skill dis
DEV	Eu81y	[X]Oth dis scholastic skills
DEV	Eu81z	[X]Dev dis scholas skills unsp
DEV	Eu82.	[X]Spec devel disor motor func
DEV	Eu83.	[X]Mix specific develop disord
DEV	R046.	[D]Other symbolic dysfunction
DEV	R0463	[D]Dyslexia
SMI	1464.	H/O: schizophrenia
SMI	146D.	H/O: manic depressive disorder
SMI	146H.	H/O: psychosis
SMI	8HHs.	Ref psychosis early inter ser
SMI	9H8..	On severe mental illnes regist
SMI	E10..	Schizophrenic disorders
SMI	E100.	Simple schizophrenia
SMI	E1000	Schizophrenia - unspecified
SMI	E1001	Schizophrenia - subchronic
SMI	E1002	Schizophrenia - chronic type
SMI	E1003	Schizophrenia-subchr.+acute ex
SMI	E1004	Schizophrenia-chr.+acute exac.
SMI	E1005	Schizophrenia in remission
SMI	E100z	Simple schizophrenia NOS
SMI	E101.	Hebephrenic schizophrenia
SMI	E1010	Hebephrenia - unspecified
SMI	E1011	Hebephrenia - subchronic
SMI	E1012	Hebephrenia - chronic
SMI	E1013	Hebephrenia-subchr.+acute exac
SMI	E1014	Hebephrenia-chronic+acute exac
SMI	E1015	Hebephrenia - in remission
SMI	E101z	Hebephrenic schizophrenia NOS
SMI	E102.	Catatonic schizophrenia
SMI	E1020	Catatonia - unspecified
SMI	E1021	Catatonia - subchronic
SMI	E1022	Catatonia - chronic
SMI	E1023	Catatonia-subchr.+acute exac.
SMI	E1024	Catatonia-chronic+acute exacer
SMI	E1025	Catatonia - in remission
SMI	E102z	Catatonic schizophrenia NOS
SMI	E103.	Paranoid schizophrenia
SMI	E1030	Paranoid schizo.- unspecified
SMI	E1031	Paranoid schizo.- subchronic
SMI	E1032	Paranoid schizo.- chronic
SMI	E1033	Paranoid schizo.-subchr.+ac ex
SMI	E1034	Paranoid schizo.-chr.+acute ex
SMI	E1035	Paranoid schizo.-in remission
SMI	E103z	Paranoid schizophrenia NOS
SMI	E104.	Acute schizophrenic episode
SMI	E105.	Latent schizophrenia
SMI	E1050	Latent schizo.- unspecified
SMI	E1051	Latent schizo.- subchronic
SMI	E1052	Latent schizo.- chronic
SMI	E1053	Latent schizo.-subchr.+ac.exac
SMI	E1054	Latent schizo.-chr.+acute exac
SMI	E1055	Latent schizo.- in remission
SMI	E105z	Latent schizophrenia NOS
SMI	E106.	Residual schizophrenia
SMI	E107.	Schizo-affective schizophrenia
SMI	E1070	Schizo-affective - unspecified
SMI	E1071	Schizo-affective - subchronic
SMI	E1072	Schizo-affective - chronic
SMI	E1073	Schizo-affective-subchr.+ac ex
SMI	E1074	Schizo-affective-chr.+acute ex
SMI	E1075	Schizo-affective-in remission
SMI	E107z	Schizo-affective schizophr.NOS
SMI	E10y.	Other schizophrenia
SMI	E10y0	Atypical schizophrenia
SMI	E10y1	Coenesthopathic schizophrenia
SMI	E10yz	Other schizophrenia NOS
SMI	E10z.	Schizophrenia NOS
SMI	E11..	Affective psychoses
SMI	E110.	Manic disorder, single episode
SMI	E1100	Single manic episode-unspecif
SMI	E1101	Single manic episode-mild
SMI	E1102	Single manic episode-moderate
SMI	E1103	Single manic episode-severe
SMI	E1104	Single manic epis.-severe+psyc
SMI	E1105	Single manic epis-part remiss.
SMI	E1106	Single manic epis-full remiss.
SMI	E110z	Manic disorder-single epis.NOS
SMI	E111.	Recurrent manic episodes
SMI	E1110	Recurrent manic episode-unspec
SMI	E1111	Recurrent manic episode-mild
SMI	E1112	Recurrent manic epis.-moderate
SMI	E1113	Recurrent manic epis.-severe
SMI	E1114	Recurr.manic epis.-severe+psyc
SMI	E1115	Recur.manic epis.-part remiss.
SMI	E1116	Recur.manic epis.-full remiss.
SMI	E111z	Recurrent manic episode NOS
SMI	E1124	Single maj.depress.severe+psyc
SMI	E1134	Recurr.maj.depres.-severe+psyc
SMI	E114.	Bipolar affective - now manic
SMI	E1140	Manic bipolar affective-unspec
SMI	E1141	Manic bipolar affective-mild
SMI	E1142	Manic bipolar affect.-moderate
SMI	E1143	Manic bipolar affect.-severe
SMI	E1144	Manic bipol.affect.severe+psyc
SMI	E1145	Manic bipol.affect.part remiss
SMI	E1146	Manic bipol.affect.full remiss
SMI	E114z	Manic bipolar affective NOS
SMI	E115.	Bipolar affective - now depres
SMI	E1150	Depressed bipolar affect.-unsp
SMI	E1151	Depress.bipolar affect.-mild
SMI	E1152	Depr.bipolar affect.-moderate
SMI	E1153	Depr.bipolar affect.-severe
SMI	E1154	Depr.bipol.affect.-severe+psyc
SMI	E1155	Depr.bipol.affect.-part remiss
SMI	E1156	Depr.bipol.affect.-full remiss
SMI	E115z	Depressed bipolar affect. NOS
SMI	E116.	Mixed bipolar affective disord
SMI	E1160	Mixed bipolar affective-unspec
SMI	E1161	Mixed bipolar affective-mild
SMI	E1162	Mixed bipolar affect.-moderate
SMI	E1163	Mixed bipolar affect.-severe
SMI	E1164	Mixed bipol.affect.severe+psyc
SMI	E1165	Mixed bipol.affect.part remiss
SMI	E1166	Mixed bipol.affect.full remiss
SMI	E116z	Mixed bipolar affective NOS
SMI	E117.	Unspec bipolar affect disord
SMI	E1170	Unspecified bipolar affective
SMI	E1171	Unsp.bipolar affective-mild
SMI	E1172	Unsp.bipolar affect.-moderate
SMI	E1173	Unsp.bipolar affect.-severe
SMI	E1174	Unsp.bipol.affect.-severe+psyc
SMI	E1175	Unsp.bipol.affect.-part remiss
SMI	E1176	Unsp.bipol.affect.-full remiss
SMI	E117z	Unspecif.bipolar affective NOS
SMI	E11y.	Other manic-depressive psychos
SMI	E11y0	Unspec manic-depressive psycho
SMI	E11y1	Atypical manic disorder
SMI	E11y2	Atypical depressive disorder
SMI	E11y3	Other mixed manic-depres psych
SMI	E11yz	Other manic-depress.psych.NOS
SMI	E11z.	Other/unsp.affective psychoses
SMI	E11z0	Unspecif.affective psych.NOS
SMI	E11zz	Other affective psychosis NOS
SMI	E12..	Paranoid states
SMI	E120.	Simple paranoid state
SMI	E121.	Chronic paranoid psychosis
SMI	E122.	Paraphrenia
SMI	E123.	Shared paranoid disorder
SMI	E12y.	Other paranoid states
SMI	E12y0	Paranoia querulans
SMI	E12yz	Other paranoid states NOS
SMI	E12z.	Paranoid psychosis NOS
SMI	E13..	Other nonorganic psychoses
SMI	E130.	Reactive depressive psychosis
SMI	E131.	Acute hysterical psychosis
SMI	E132.	Reactive confusion
SMI	E133.	Acute paranoid reaction
SMI	E134.	Psychogenic paranoid psychosis
SMI	E13y.	Other reactive psychoses
SMI	E13y0	Psychogenic stupor
SMI	E13y1	Brief reactive psychosis
SMI	E13yz	Other reactive psychoses NOS
SMI	E13z.	Nonorganic psychosis NOS
SMI	E1y..	Non-organic psychoses OS
SMI	E1z..	Non-organic psychosis NOS
SMI	E2122	Schizotypal personality
SMI	Eu2..	[X]Schizoph,schizotyp,delusion
SMI	Eu20.	[X]Schizophrenia
SMI	Eu200	[X]Paranoid schizophrenia
SMI	Eu201	[X]Hebephrenic schizophrenia
SMI	Eu202	[X]Catatonic schizophrenia
SMI	Eu203	[X]Undifferentiated schizophrn
SMI	Eu204	[X]Post-schizophrenic depressn
SMI	Eu205	[X]Residual schizophrenia
SMI	Eu206	[X]Simple schizophrenia
SMI	Eu20y	[X]Other schizophrenia
SMI	Eu20z	[X]Schizophrenia, unspecified
SMI	Eu21.	[X]Schizotypal disorder
SMI	Eu22.	[X]Persistent delusional dis
SMI	Eu220	[X]Delusional disorder
SMI	Eu221	[X]Delusion misidentificat syn
SMI	Eu222	[X]Cotard syndrome
SMI	Eu223	[X]Paranoid state in remission
SMI	Eu22y	[X]Oth persistent delusion dis
SMI	Eu22z	[X]Persist delusion dis, unsp
SMI	Eu23.	[X]Acute/transient psychot dis
SMI	Eu230	[X]Ac polymorph psych,no schiz
SMI	Eu231	[X]Ac polymorph psych + schiz
SMI	Eu232	[X]Ac schizoph-like psych dis
SMI	Eu233	[X]Oth ac predom delus psy dis
SMI	Eu23y	[X]Oth ac and trans psych dis
SMI	Eu23z	[X]Ac and trans psych dis unsp
SMI	Eu24.	[X]Induced delusional disorder
SMI	Eu25.	[X]Schizoaffective disorders
SMI	Eu250	[X]Schizaffect dis manic type
SMI	Eu251	[X]Schzaffctve dis depres type
SMI	Eu252	[X]Schizaffctve dis mixed type
SMI	Eu25y	[X]Ot schizoaffective disorder
SMI	Eu25z	[X]Schizoaffective disord unsp
SMI	Eu26.	[X]Nonorgan psychos in remiss
SMI	Eu2y.	[X]Ot nonorganic psychotic dis
SMI	Eu2z.	[X]Unspec nonorganic psychosis
SMI	Eu30.	[X]Manic episode
SMI	Eu300	[X]Hypomania
SMI	Eu301	[X]Mania without psychotic sym
SMI	Eu302	[X]Mania with psychotic sympts
SMI	Eu30y	[X]Other manic episodes
SMI	Eu30z	[X]Manic episode, unspecified
SMI	Eu31.	[X]Bipolar affective disorder
SMI	Eu310	[X]Bipol affec current hypoman
SMI	Eu311	[X]Bipol aff, manic no psychos
SMI	Eu312	[X]Bipol affect manic+psychos
SMI	Eu313	[X]Bipol aff mild/mod depress
SMI	Eu314	[X]Bipol AD,cur sev dep,no psy
SMI	Eu315	[X]Bipol aff sev depress/psych
SMI	Eu316	[X]Bipol affective dis, mixed
SMI	Eu317	[X]Bipol affect dis remission
SMI	Eu318	[X]Bipol affect disord type I
SMI	Eu319	[X]Bipol affect disord type II
SMI	Eu31y	[X]Oth bipolar affectve disord
SMI	Eu31z	[X]Bipolar affectve dis unsp
SMI	Eu323	[X]Severe depressive + psychot
SMI	Eu328	[X]Maj dep, sev with psyc symp
SMI	Eu329	[X]Sin ma dep ep sev ps ps rem
SMI	Eu32A	[X]Rec ma dep ep sev ps ps rem
SMI	Eu333	[X]Recurr dep now sever+psych
SMI	ZV110	[V]PH - Schizophrenia

## Sheet: Read code SUD and DD
GROUP_NAME	CODE_VALUE	CODE_NAME
CC	E01..	Alcoholic psychoses
CC	E010.	Alcohol withdrawal delirium
CC	E011.	Alcohol amnestic syndrome
CC	E0110	Korsakovs alcoholic psychosis
CC	E0111	Korsakov + peripheral neuritis
CC	E0112	Wernicke-Korsakov syndrome
CC	E011z	Alcohol amnestic syndrome NOS
CC	E012.	Other alcoholic dementia
CC	E0120	Chronic alcoholic brain syndr.
CC	E013.	Alcohol withdrawal hallucinos.
CC	E014.	Pathological alcohol intoxic.
CC	E015.	Alcoholic paranoia
CC	E01y.	Other alcoholic psychosis
CC	E01y0	Alcohol withdrawal syndrome
CC	E01yz	Other alcoholic psychosis NOS
CC	E01z.	Alcoholic psychosis NOS
CC	E02..	Drug psychoses
CC	E020.	Drug withdrawal syndrome
CC	E021.	Drug-induced paranoia/hallucin
CC	E0210	Drug-induced paranoid state
CC	E0211	Drug-induced hallucinosis
CC	E021z	Drug-induc.paranoia/halluc NOS
CC	E022.	Pathological drug intoxication
CC	E02y.	Other drug psychoses
CC	E02y0	Drug-induced delirium
CC	E02y1	Drug-induced dementia
CC	E02y2	Drug-induced amnestic syndrome
CC	E02y3	Drug-induced depressive state
CC	E02y4	Drug-induced personality dis.
CC	E02yz	Other drug psychoses NOS
CC	E02z.	Drug psychosis NOS
CC	Eu1..	[X]Mental dis, psychoact subst
CC	Eu10.	[X]Mental dis due to alcohol
CC	Eu100	[X]Acute alcohol intoxication
CC	Eu101	[X]Harmful use of alcohol
CC	Eu102	[X]Alcohol dependence syndrome
CC	Eu103	[X]Alcohol withdrawal state
CC	Eu104	[X]Alcohol withdrawal delirium
CC	Eu105	[X]Psychot dis due to alcohol
CC	Eu106	[X]Amnesic synd due to alcohol
CC	Eu107	[X]Resid psychotic due alcohol
CC	Eu108	[X]Alcohol withdraw-induc seiz
CC	Eu10y	[X]Ot ment/beh dis due alcohol
CC	Eu10z	[X]Uns ment/beh dis due alcohl
CC	Eu11.	[X]Mental dis due to opioids
CC	Eu110	[X]Acute opioid intoxication
CC	Eu111	[X]Harmful use of opioids
CC	Eu112	[X]Opioid dependence syndrome
CC	Eu113	[X]Opioid withthdrawal state
CC	Eu114	[X]Opioid withdrawal delirium
CC	Eu115	[X]Psychot dis due to opioids
CC	Eu116	[X]Amnesic synd due to opioids
CC	Eu117	[X]Resid psychotic due opioid
CC	Eu11y	[X]Oth ment/beh dis due opioid
CC	Eu11z	[X]Uns ment/beh dis due opioid
CC	Eu12.	[X]Mental dis due cannabinoids
CC	Eu120	[X]Acute cannabis intoxication
CC	Eu121	[X]Harmful use of cannabis
CC	Eu122	[X]Cannabis dependence syndrom
CC	Eu123	[X]Cannabis withdrawal state
CC	Eu124	[X]Cannabis withdrawl delirium
CC	Eu125	[X]Psychot dis due to cannabis
CC	Eu126	[X]Amnesic synd due cannabis
CC	Eu127	[X]Resid psychot due cannabis
CC	Eu12y	[X]Oth ment/beh dis cannabinds
CC	Eu12z	[X]Unsp mnt/beh dis cannabinds
CC	Eu13.	[X]Mental dis due sedat/hypnot
CC	Eu130	[X]Acute sedat/hypnotic intox
CC	Eu131	[X]Harmful use sedat/hypnotic
CC	Eu132	[X]Sedat/hypnotic depend syndr
CC	Eu133	[X]Sedat/hypnot withdraw state
CC	Eu134	[X]Sed/hypn withdraw delirium
CC	Eu135	[X]Psychot dis due sedat/hypn
CC	Eu136	[X]Amnesic synd due sedat/hypn
CC	Eu137	[X]Resid psychot due sed/hypn
CC	Eu13y	[X]Oth ment/beh dis sed/hypnot
CC	Eu13z	[X]Uns ment/beh dis sed/hypnot
CC	Eu14.	[X]Mental dis due use cocaine
CC	Eu140	[X]Acute cocaine intoxication
CC	Eu141	[X]Harmful use of cocaine
CC	Eu142	[X]Cocaine dependence syndrome
CC	Eu143	[X]Cocaine withdrawal state
CC	Eu144	[X]Cocaine withdrawal delirium
CC	Eu145	[X]Psychot dis due to cocaine
CC	Eu146	[X]Amnesic synd due to cocaine
CC	Eu147	[X]Resid psychot due cocaine
CC	Eu14y	[X]Ot ment/beh dis due cocaine
CC	Eu14z	[X]Uns ment/bh dis due cocaine
CC	Eu15.	[X]Ment dis oth stimul/caffein
CC	Eu150	[X]Acute intoxic oth stimulant
CC	Eu151	[X]Harmful use other stimulant
CC	Eu152	[X]Oth stimulant dependen synd
CC	Eu153	[X]Oth stimulant withdr state
CC	Eu154	[X]Oth stimulant withdr delir
CC	Eu155	[X]Psychotic dis oth stimulant
CC	Eu156	[X]Amnesic syndr oth stimulant
CC	Eu157	[X]Resid psychot oth stimulant
CC	Eu15y	[X]Oth ment/beh dis stimulant
CC	Eu15z	[X]Uns ment/beh dis stimulant
CC	Eu16.	[X]Mental disord hallucinogens
CC	Eu160	[X]Acute hallucinogen intoxic
CC	Eu161	[X]Harmful use hallucinogens
CC	Eu162	[X]Hallucinogen depend synd
CC	Eu163	[X]Hallucinogen withdraw state
CC	Eu164	[X]Hallucin withdraw delirium
CC	Eu165	[X]Psychotic due hallucinogen
CC	Eu166	[X]Amnesic synd due hallucinog
CC	Eu167	[X]Resid psychot hallucinogen
CC	Eu16y	[X]Oth ment/beh dis hallucinog
CC	Eu16z	[X]Uns ment/beh dis hallucinog
CC	Eu18.	[X]Ment dis volatile solvents
CC	Eu180	[X]Acute solvent intoxication
CC	Eu181	[X]Harmful use of solvents
CC	Eu182	[X]Solvent dependence syndrome
CC	Eu183	[X]Solvent withdrawal state
CC	Eu184	[X]Solvent withdrawal delirium
CC	Eu185	[X]Psychotic dis due solvent
CC	Eu186	[X]Amnesic syndr due solvent
CC	Eu187	[X]Resid psychotic due solvent
CC	Eu18y	[X]Ot ment/beh dis due solvent
CC	Eu18z	[X]Uns ment/beh due solvent
CC	Eu19.	[X]Ment disord multi drug use
CC	Eu190	[X]Acute intox multi drug use
CC	Eu191	[X]Harmful use multiple drugs
CC	Eu192	[X]Multiple drug dependence
CC	Eu193	[X]Multiple drug withdrawal
CC	Eu194	[X]Multi drug withdr delirium
CC	Eu195	[X]Psychotic due multi drugs
CC	Eu196	[X]Amnesic syn due multi drugs
CC	Eu197	[X]Resid psychotic multi drugs
CC	Eu19y	[X]Ot ment/beh due multi drugs
CC	Eu19z	[X]Un ment/beh due multi drugs
CC	Eu1A.	[X]Men behav dis due crack coc
CC	Eu1A0	[X]Acute crack cocaine intoxic
CC	Eu1A1	[X]Harmful use crack cocaine
CC	Eu1A2	[X]Crack cocaine depend synd
CC	Eu1A3	[X]Crack cocaine withdraw stat
CC	Eu1A4	[X]Crack coc withdraw stat del
CC	Eu1A5	[X]Crack cocaine psychotic dis
CC	Eu1A6	[X]Crack cocaine amnesic synd
CC	Eu1A7	[X]Cra coc res late-on psy dis
CC	Eu1Ay	[X]Crac coc other ment beh dis
CC	Eu1Az	[X]Crack coc unsp men beh dis
SUD	1365.	Heavy drinker - 7-9u/day
SUD	1366.	Very heavy drinker - >9u/day
SUD	1462.	H/O: alcoholism
SUD	1463.	H/O: drug dependency
SUD	136c.	Higher risk drinking
SUD	136P.	Heavy drinker
SUD	136Q.	Very heavy drinker
SUD	136R.	Binge drinker
SUD	136S.	Hazardous alcohol use
SUD	136T.	Harmful alcohol use
SUD	136W.	Alcohol misuse
SUD	136Y.	Drink in a.m. to rid hangover
SUD	13c..	Drug user
SUD	13c0.	Injecting drug user
SUD	13c1.	Intravenous drug user
SUD	13c2.	Never injecting drug user
SUD	13c3.	Intramuscular drug user
SUD	13c4.	Intranasal drug user
SUD	13c5.	Substance misuse increased
SUD	13c6.	Substance misuse decreased
SUD	13c7.	Current drug user
SUD	13c8.	Reduced drugs misuse
SUD	13c9.	Subcutaneous drug user
SUD	13cA.	Smokes drugs
SUD	13cB.	Misuses drugs orally
SUD	13cC.	Continuous use of drugs
SUD	13cD.	Episodic use of drugs
SUD	13cE.	Prolong high dose use cannabis
SUD	13cF.	Preoccup with substance misuse
SUD	13cG.	Drug tolerance
SUD	13cG0	Opioid tolerant
SUD	13cG1	Opioid naive
SUD	13cH.	Persistent substance misuse
SUD	13cJ.	Previously injecting drug user
SUD	13cK.	Current non recreat drug user
SUD	13cL.	Has never injected drugs
SUD	13cM.	Substance misuse
SUD	13cM0	Novl psychactve sbstnce misuse
SUD	13cM1	Opioid analgesic dependence
SUD	13cN.	Has nvr shrd drg injctn equipt
SUD	13cQ.	Behavioural tolerance to drug
SUD	13cR.	Physical tolerance to drug
SUD	13cS.	Psychological drug tolerance
SUD	13cT.	Reverse tolerance to drug
SUD	13Y8.	Alcoholics anonymous
SUD	146C.	Failed heroin detoxification
SUD	146E.	H/O: recreational drug use
SUD	146F.	H/O: drug abuse
SUD	1B1c.	Alcohol induced hallucinations
SUD	1P30.	Compul uncontrollable drug tak
SUD	1P31.	Compulsive drug taking
SUD	1T...	History of substance misuse
SUD	1T0..	H/O heroin misuse
SUD	1T00.	H/O daily heroin misuse
SUD	1T01.	H/O weekly heroin misuse
SUD	1T02.	Prev history of heroin misuse
SUD	1T03.	H/O infrequent heroin misuse
SUD	1T1..	H/O methadone misuse
SUD	1T10.	H/O daily methadone misuse
SUD	1T11.	H/O weekly methadone misuse
SUD	1T12.	H/O infrequent methadone misus
SUD	1T13.	Prev history methadone misuse
SUD	1T2..	H/O ecstasy misuse
SUD	1T20.	H/O daily ecstasy misuse
SUD	1T21.	H/O weekly ecstasy misuse
SUD	1T22.	H/O infrequent ecstasy misuse
SUD	1T23.	Prev history of ecstasy misuse
SUD	1T3..	H/O benzodiazepine misuse
SUD	1T30.	H/O daily benzodiazepin misuse
SUD	1T31.	H/O weekly benzodiazep misuse
SUD	1T32.	H/O infreq benzodiazep misuse
SUD	1T33.	Prev H/O benzodiazepine misuse
SUD	1T4..	H/O amphetamine misuse
SUD	1T40.	H/O daily amphetamine misuse
SUD	1T41.	H/O weekly amphetamine misuse
SUD	1T42.	H/O infrequent amphetam misuse
SUD	1T43.	Prev H/O amphetamine misuse
SUD	1T5..	H/O cocaine misuse
SUD	1T50.	H/O daily cocaine misuse
SUD	1T51.	H/O weekly cocaine misuse
SUD	1T52.	H/O infrequent cocaine misuse
SUD	1T53.	Prev H/O cocaine misuse
SUD	1T6..	H/O crack cocaine misuse
SUD	1T60.	H/O daily crack cocaine misuse
SUD	1T61.	H/O weekly crack cocain misuse
SUD	1T62.	H/O infrequ crack cocain misus
SUD	1T63.	Prev H/O crack cocaine misuse
SUD	1T7..	H/O hallucinogen misuse
SUD	1T70.	H/O daily hallucinogen misuse
SUD	1T71.	H/O weekly hallucinogen misuse
SUD	1T72.	H/O infrequ hallucinog misuse
SUD	1T73.	Prev H/O hallucinogen misuse
SUD	1T8..	H/O cannabis misuse
SUD	1T80.	H/O daily cannabis misuse
SUD	1T81.	H/O weekly cannabis misuse
SUD	1T82.	H/O infrequent cannabis misuse
SUD	1T83.	Prev H/O cannabis misuse
SUD	1T9..	H/O solvent misuse
SUD	1T90.	H/O daily solvent misuse
SUD	1T91.	H/O weekly solvent misuse
SUD	1T92.	H/O infrequent solvent misuse
SUD	1T93.	Prev history of solvent misuse
SUD	1TA..	H/O barbiturate misuse
SUD	1TA0.	H/O daily barbiturate misuse
SUD	1TA1.	H/O weekly barbiturate misuse
SUD	1TA2.	H/O infrequ barbiturate misuse
SUD	1TA3.	Prev H/O barbiturate misuse
SUD	1TB..	H/O major tranquilliser misuse
SUD	1TB0.	H/O daily maj tranquilli misus
SUD	1TB1.	H/O weekl maj tranquilli misus
SUD	1TB2.	H/O infreq maj trnquillis miss
SUD	1TB3.	Prev H/O major tranq misuse
SUD	1TC..	H/O anti-depressant misuse
SUD	1TC0.	H/O daily anti-depress misuse
SUD	1TC1.	H/O weekly anti-depress misuse
SUD	1TC2.	H/O infreq anti-depress misuse
SUD	1TC3.	Prev H/O anti-depressnt misuse
SUD	1TD..	H/O opiate misuse
SUD	1TD0.	H/O daily opiate misuse
SUD	1TD1.	H/O weekly opiate misuse
SUD	1TD2.	H/O infrequent opiate misuse
SUD	1TD3.	Prev history of opiate misuse
SUD	1TE..	Uses heroin on top subst ther
SUD	1TF..	Dsnt use heroin top subst ther
SUD	1TG..	H/O nov psychoact subst misuse
SUD	1V...	Drug misuse behaviour
SUD	1V0..	Misuses drugs
SUD	1V00.	Occasional drug user
SUD	1V01.	Long-term drug misuser
SUD	1V02.	Poly-drug misuser
SUD	1V03.	Misuses drugs sublingually
SUD	1V04.	Misuses drugs rectally
SUD	1V05.	Misuses drugs vaginally
SUD	1V06.	Uses drug paraphernalia
SUD	1V07.	Notified addict
SUD	1V08.	Smokes drugs in cigarette form
SUD	1V09.	Smokes drugs through a pipe
SUD	1V0A.	Chases the dragon
SUD	1V0B.	Sniffs drugs
SUD	1V0C.	Drug addict
SUD	1V0D.	Am spent per day on drug habit
SUD	1V0E.	Health prob sec to drug misuse
SUD	1V1..	Time devotd drug rel activties
SUD	1V10.	Time spent obtaining drugs
SUD	1V11.	Time spent taking drugs
SUD	1V12.	Time spent recover from drugs
SUD	1V2..	Frequency of drug misuse
SUD	1V22.	Age at starting drug misuse
SUD	1V23.	Time since stopped drug misuse
SUD	1V24.	Total time drugs misused
SUD	1V26.	Misused drugs in past
SUD	1V3..	Drug injection behaviour
SUD	1V30.	Injects drugs subcutaneously
SUD	1V31.	Injects drugs intramuscularly
SUD	1V32.	Neck injector
SUD	1V33.	Groin injector
SUD	1V34.	Does not inject drugs
SUD	1V35.	Shares drug equipment
SUD	1V36.	Frontloading
SUD	1V37.	Drug inject equipment hygiene
SUD	1V38.	Sharing drug inject equipment
SUD	1V3A.	Not share drug inject equipmen
SUD	1V3B.	Shares syringes
SUD	1V3C.	Shares needles
SUD	1V3D.	Cleaning of needles
SUD	1V3E.	Cleans own needles
SUD	1V3F.	Cleans needles with bleach
SUD	1V3G.	Does not clean needles
SUD	1V3H.	Obtains clean needles
SUD	1V3J.	Uses needle exchange scheme
SUD	1V3K.	Obtains clean syringes
SUD	1V3L.	Needle syringe exch scheme use
SUD	1V3M.	Needle + syringe exch not used
SUD	1V3N.	Needle and syringe exch used
SUD	1V4..	Priority of drug activity
SUD	1V40.	No priority to drug activities
SUD	1V41.	Priority to drug activities
SUD	1V42.	Drug priority ov social obligs
SUD	1V43.	Drug priority over family
SUD	1V44.	Drug priority ov finance oblig
SUD	1V5..	Routine drug-related activity
SUD	1V50.	No routine of drug activities
SUD	1V51.	Has routine of drug activities
SUD	1V52.	Same drug routine every day
SUD	1V53.	Drug-related rituals
SUD	1V54.	Follows drug-related rituals
SUD	1V55.	Not follow drug-relate rituals
SUD	1V6..	Drug-relat offending behaviour
SUD	1V64.	Illicit drug use
SUD	1V65.	Heroin misuse
SUD	1V66.	Ecstasy misuse
SUD	38Dz.	Sever alcoh depend questionn
SUD	66e..	Alcohol disorder monitoring
SUD	66e0.	Alcohol abuse monitoring
SUD	677T.	Subst misuse structurd counsel
SUD	7P220	Delivery rehab drug addiction
SUD	7P221	Del rehab alcohol addiction
SUD	8AA..	Drug abuse monitoring
SUD	8B23.	Drug addiction therapy
SUD	8B230	Drug add maint ther naltrexone
SUD	8B231	Drug add maint ther lofexidine
SUD	8B2M.	Buprenorphine maintenance ther
SUD	8B2N.	Drug add detox ther methadone
SUD	8B2P.	Drug add maint ther methadone
SUD	8B2Q.	Drug add maint ther buprenorph
SUD	8B2R.	Drug add detox ther buprenorph
SUD	8B2S.	Opioid agonist substitut thera
SUD	8B2T.	Opioid antagonist therapy
SUD	8BA8.	Alcohol detoxification
SUD	8BA9.	Detoxification dependence drug
SUD	8BAc.	Subs mis mgt stop - self withd
SUD	8BAd.	Opiate dependence detoxificatn
SUD	8BAs.	Alcohol relapse prevention
SUD	8BAt.	Drug relapse prevention
SUD	8BAu.	Alcohol harm reduction prog
SUD	8BAv.	Drug harm reduction programme
SUD	8BAw.	Alcohol twelve step programme
SUD	8BAW.	Drug depen self detoxification
SUD	8BAX.	Drug depen home detoxification
SUD	8BAx.	Drug twelve step programme
SUD	8BE..	Maintenance therapy
SUD	8BE0.	Reinduct methadone maint thera
SUD	8BE1.	Reinduct buprenorph maint ther
SUD	8CAv.	Adv cont prim care alcoh workr
SUD	8CR9.	Benzodiazepi clinical mgt plan
SUD	8FB..	Drug rehabilitation
SUD	8FB0.	Drug detox programme completed
SUD	8G32.	Aversion therapy - alcoholism
SUD	8H35.	Admit to alcohol detox centre
SUD	8H7p.	Refer community alcohol team
SUD	8H7x.	Refer to drug abuse counsellor
SUD	8Hh1.	Self refer substanc misus serv
SUD	8HHd.	Referral to drug treatment cen
SUD	8HHe.	Referral to com drug alco team
SUD	8HHL.	Ref to comm drug dependen team
SUD	8HkF.	Refer substance misuse service
SUD	8HkG.	Ref to special alco treat serv
SUD	8HkJ.	Ref alchl brief intervntin ser
SUD	8Hl5.	Referral to drugs therapist
SUD	8Hl6.	Referral to drugs worker
SUD	8Hq..	Admsn substnc misuse detox cnt
SUD	8I2N.	Drug depend home detox contra
SUD	8IAF.	Brief intervent ex alc declind
SUD	8IAJ.	Decld ref spec alco treat serv
SUD	8IAt.	Ext inter exc alco consump dec
SUD	8IE7.	Substance misuse assess declin
SUD	8IEA.	Ref comm alcohol team declined
SUD	9G2..	Drug addiction notification
SUD	9G21.	Drug addict notific to CMO
SUD	9G22.	Drug addict re-notific due
SUD	9G23.	Drug addict re-notif to CMO
SUD	9G2Z.	Drug addiction notif NOS
SUD	9HC..	Substance misuse monitoring
SUD	9HC0.	Initial substance misuse asses
SUD	9HC1.	Follow up substa misuse assess
SUD	9HC2.	Subst mis clin man plan agreed
SUD	9HC3.	Subst mis clin man plan review
SUD	9HC4.	Sub misuse treatment withdrawn
SUD	9HC5.	Sub misus treat prog completed
SUD	9HC6.	Substance misuse treatm declin
SUD	9HC7.	Subst misuse treat not availbl
SUD	9HC8.	Decl to give subst misuse hist
SUD	9HC9.	Snc mse tmnt gvn othr hcr prdr
SUD	9HCA.	Sbstnce misuse mntr 6 mnth rvw
SUD	9HCB.	Substance misuse mntr annl rvw
SUD	9HCC.	On substance misuse programme
SUD	9k1..	Alcohol misuse - enh ser admin
SUD	9k10.	Comm detoxification registered
SUD	9k11.	Alcohol consumption counsellin
SUD	9k12.	Alco misuse - enh serv complet
SUD	9k14.	Alco counsel by other agencies
SUD	9k19.	Alco asses dclnd - enh ser adm
SUD	9k1A.	Brief intervent ex alc complet
SUD	9k1B.	Extend intervent ex alc complt
SUD	9k5..	Drug misuse - enhan serv admin
SUD	9k50.	Drug misuse - enh serv complet
SUD	9k51.	Share care drug misu trt - ESA
SUD	9k52.	Drug misus trt prim care - ESA
SUD	9k53.	Phrmcy attend drug misus - ESA
SUD	9kS..	Drug mis asse decl - enha serv
SUD	9N0Z.	Seen in drug rehab centre
SUD	9N1yJ	Seen in drug misuse clinic
SUD	9N6a.	Refer by drug statutor service
SUD	9N6b.	Ref by drug non-statutory serv
SUD	9N6g.	Refer by syringe excha service
SUD	9NdN.	Declnd consnt notif drug misus
SUD	9NgzH	Withdrawn alcohol detox progra
SUD	9NJz.	In-house alcohol detoxificatin
SUD	9NN1.	Under care community drug team
SUD	9NN2.	Under care comm alcohol team
SUD	9No5.	Seen in substance misuse clinc
SUD	9NX2.	In-house subs misuse treatment
SUD	9Nz9.	Emrgcy dept attn alcohl consum
SUD	9NzA.	Hospital attend alcohl consump
SUD	C1505	Alchl-indc pseud-Cushings syn
SUD	C253.	Wernickes encephalopathy
SUD	dj36.	SUBUTEX 400micrograms s/l tabs
SUD	dj37.	SUBUTEX 2mg sublingual tablets
SUD	dj38.	SUBUTEX 8mg sublingual tablets
SUD	dj3c.	PREFIBIN 400mcg sublingual tab
SUD	dj3d.	PREFIBIN 2mg sublingual tabs
SUD	dj3D.	BUPRNRPHNE+NALOXN 2/0.5mg tabs
SUD	dj3E.	SUBOXONE 2mg/0.5mg s/l tabs
SUD	dj3e.	PREFIBIN 8mg sublingual tabs
SUD	dj3F.	BUPRNRPHNE+NALOXN 8mg/2mg tabs
SUD	dj3G.	SUBOXONE 8mg/2mg s/l tabs
SUD	dj3K.	NATZON 400micrograms s/l tabs
SUD	dj3L.	NATZON 2mg sublingual tablets
SUD	dj3M.	NATZON 8mg sublingual tablets
SUD	dj3N.	GABUP 400micrograms s/l tabs
SUD	dj3O.	GABUP 1mg sublingual tablets
SUD	dj3P.	GABUP 2mg sublingual tablets
SUD	dj3Q.	GABUP 4mg sublingual tablets
SUD	dj3R.	GABUP 6mg sublingual tablets
SUD	dj3S.	GABUP 8mg sublingual tablets
SUD	dj3T.	BUPRENORPHINE 1mg s/l tabs
SUD	dj3U.	BUPRENORPHINE 4mg s/l tabs
SUD	dj3u.	BUPRENORPHINE 2mg s/l tabs
SUD	dj3V.	BUPRENORPHINE 6mg s/l tabs
SUD	dj3v.	BUPRENORPHINE 8mg s/l tabs
SUD	djc..	METHADONE HCL [ANALGESIC]
SUD	djc1.	PHYSEPTONE 5mg tablets
SUD	djc2.	PHYSEPTONE 10mg/1mL injection
SUD	djc3.	METHADONE 1mg/1mL mixture
SUD	djc4.	METHADONE HCL 50mg/5mL s/f liq
SUD	djc5.	MARTINDALE METHADONE DTF mixt
SUD	djc6.	METHODEX 1mg/1mL mixture
SUD	djc7.	METHADOSE 10mg/mL s/f liq
SUD	djc8.	METHADONE HCL 20mg/mL s/f liq
SUD	djc9.	METHADOSE 20mg/mL s/f liq
SUD	djcA.	METHADONE DILUENT liquid
SUD	djcB.	METHADOSE DILUENT liquid
SUD	djcC.	METHADONE 1mg/1mL s/f mixt
SUD	djcD.	METHAROSE 1mg/1mL s/f soln
SUD	djcE.	*PINADONE 1mg/1mL mixture
SUD	djcF.	*PINADONE 1mg/1mL s/f mixt
SUD	djcG.	PHYSEPTONE 20mg/2mL injection
SUD	djcH.	PHYSEPTONE 35mg/3.5mL inj
SUD	djcJ.	PHYSEPTONE 50mg/5mL injection
SUD	djcK.	PHYSEPTONE 1mg/1mL s/f mixture
SUD	djcL.	PHYSEPTONE 1mg/1mL mixture
SUD	djcM.	SYNASTONE 10mg/1mL injection
SUD	djcN.	SYNASTONE 20mg/2mL injection
SUD	djco.	METHADONE 20mg/20mL oral soln
SUD	djcO.	SYNASTONE 35mg/3.5mL injection
SUD	djcP.	SYNASTONE 50mg/5mL injection
SUD	djcp.	METHADONE 40mg/40mL oral soln
SUD	djcQ.	SYNASTONE 50mg/2mL injection
SUD	djcq.	METHADONE 60mg/60mL oral soln
SUD	djcR.	SYNASTONE 50mg/1mL injection
SUD	djcr.	METHADONE 100mg/20mL oral soln
SUD	djcS.	PHYSEPTONE 50mg/2mL injection
SUD	djcs.	METHADONE 5mg/mL oral solution
SUD	djct.	METHADONE HCL 50mg/2mL inj
SUD	djcT.	PHYSEPTONE 50mg/1mL injection
SUD	djcu.	METHADONE HCL 50mg/1mL inj
SUD	djcU.	EPTADONE 1mg/mL oral solution
SUD	djcV.	EPTADONE 5mg/mL oral solution
SUD	djcv.	METHADONE HCL 20mg/2mL inj
SUD	djcW.	EPTADONE 20mg/20mL oral soln
SUD	djcw.	METHADONE HCL 35mg/3.5mL inj
SUD	djcx.	METHADONE HCL 50mg/5mL inj
SUD	djcX.	EPTADONE 40mg/40mL oral soln
SUD	djcY.	EPTADONE 60mg/60mL oral soln
SUD	djcy.	METHADONE HCL 5mg tablets
SUD	djcz.	METHADONE HCL 10mg/1mL inj
SUD	djcZ.	EPTADONE 100mg/20mL oral soln
SUD	du1..	DISULFIRAM
SUD	du11.	DISULFIRAM 200mg tablets
SUD	du12.	ANTABUSE 200mg tablets
SUD	du2..	NALTREXONE HYDROCHLORIDE
SUD	du21.	NALTREXONE HCL 50mg tablets
SUD	du22.	NALOREX 50mg tablets
SUD	du23.	OPIZONE 50mg tablets
SUD	du24.	ADEPEND 50mg tablets
SUD	du4..	LOFEXIDINE HYDROCHLORIDE
SUD	du41.	BRITLOFEX 200mcg tablets
SUD	du42.	LOFEXIDINE HCL 200mcg tablets
SUD	du5..	ACAMPROSATE CALCIUM
SUD	du51.	ACAMPROSATE CAL 333mg e/c tabs
SUD	du52.	CAMPRAL EC 333mg e/c tablets
SUD	E23..	Alcohol dependence syndrome
SUD	E230.	Acute alcoholic intoxication
SUD	E2300	Acute alcoholic intoxic. unsp.
SUD	E2301	Acute alcoh.intox.-continuous
SUD	E2302	Acute alcoh.intox.-episodic
SUD	E2303	Acute alcoh.intox.in remission
SUD	E230z	Acute alcoholic intoxic. NOS
SUD	E231.	Chronic alcoholism
SUD	E2310	Chronic alcoholism unspecified
SUD	E2311	Chronic alcoholism-continuous
SUD	E2312	Chronic alcoholism-episodic
SUD	E2313	Chronic alcohol.- in remission
SUD	E231z	Chronic alcoholism NOS
SUD	E23z.	Alcohol dependence syndr. NOS
SUD	E24..	Drug dependence
SUD	E240.	Opioid type drug dependence
SUD	E2400	Opioid dependence-unspecified
SUD	E2401	Opioid dependence-continuous
SUD	E2402	Opioid dependence - episodic
SUD	E2403	Opioid dependence-in remission
SUD	E240z	Opioid drug dependence NOS
SUD	E241.	Hypnotic/anxiolytic dependence
SUD	E2410	Hypnotic/anxiol.depend.-unspec
SUD	E2411	Hypnot/anxiol.dep.-continuous
SUD	E2412	Hypnot/anxiol.dep.-episodic
SUD	E2413	Hypnot/anxiol.dep-in remission
SUD	E241z	Hypnotic/anxiolytic depend.NOS
SUD	E242.	Cocaine type drug dependence
SUD	E2420	Cocaine dependence-unspecified
SUD	E2421	Cocaine dependence-continuous
SUD	E2422	Cocaine dependence-episodic
SUD	E2423	Cocaine depend. - in remission
SUD	E242z	Cocaine drug dependence NOS
SUD	E243.	Cannabis type drug dependence
SUD	E2430	Cannabis dependence-unspecif.
SUD	E2431	Cannabis dependence-continuous
SUD	E2432	Cannabis dependence-episodic
SUD	E2433	Cannabis depend.- in remission
SUD	E243z	Cannabis drug dependence NOS
SUD	E244.	Amphetamine/psychostim.depend.
SUD	E2440	Amphetamine depend.-unspecif.
SUD	E2441	Amphetamine depend.-continuous
SUD	E2442	Amphetamine depend.-episodic
SUD	E2443	Amphetamine dep.-in remission
SUD	E244z	Amphetamine dependence NOS
SUD	E245.	Hallucinogen dependence
SUD	E2450	Hallucinogen depend.-unspecif.
SUD	E2451	Hallucinogen depend-continuous
SUD	E2452	Hallucinogen depend.-episodic
SUD	E2453	Hallucinogen dep.-in remission
SUD	E245z	Hallucinogen dependence NOS
SUD	E246.	Glue sniffing dependence
SUD	E2460	Glue sniffing - unspecified
SUD	E2461	Glue sniffing - continuous
SUD	E2462	Glue sniffing - episodic
SUD	E2463	Glue sniffing - in remission
SUD	E246z	Glue sniffing dependence NOS
SUD	E247.	Other specified drug dependen.
SUD	E2470	Other drug dependence unspecif
SUD	E2471	Other drug depend.-continuous
SUD	E2472	Other drug depend.-episodic
SUD	E2473	Other drug dep.-in remission
SUD	E247z	Other drug dependence NOS
SUD	E248.	Combined opioid+other drug dep
SUD	E2480	Opioid+other drug dep. unspec.
SUD	E2481	Continuous opioid+other depen.
SUD	E2482	Episodic opioid+other depend.
SUD	E2483	In remission-opioid+other dep.
SUD	E248z	Opioid+other drug depend. NOS
SUD	E249.	Combined drug dep. excl.opioid
SUD	E2490	Comb.drug dep ex opioid-unspec
SUD	E2491	Comb.drug dep ex opioid-contin
SUD	E2492	Comb.drug dep ex opioid-episod
SUD	E2493	Comb.drug dep ex opioid-in rem
SUD	E249z	Comb.drug dep ex opioid NOS
SUD	E24A.	Ecstasy type drug dependence
SUD	E24z.	Drug dependence NOS
SUD	E25..	Nondependent abuse of drugs
SUD	E250.	Alcohol abuse - nondependent
SUD	E2500	Alcohol abuse - unspecified
SUD	E2501	Alcohol abuse - continuous
SUD	E2502	Alcohol abuse - episodic
SUD	E2503	Alcohol abuse - in remission
SUD	E250z	Nondependent alcohol abuse NOS
SUD	E252.	Nondependent cannabis abuse
SUD	E2520	Nondep cannabis abuse - unspec
SUD	E2521	Nondep cannabis abuse - contin
SUD	E2522	Nondep cannabis abuse - episod
SUD	E2523	Nondep cannabis abuse in remis
SUD	E252z	Nondep cannabis abuse NOS
SUD	E253.	Nondependen hallucinogen abuse
SUD	E2530	Nondep hallucinogen abuse-unsp
SUD	E2531	Nondep hallucinogen abuse-cont
SUD	E2532	Nondep hallucinogen abuse-epis
SUD	E2533	Nondep hallucin abuse-in remis
SUD	E253z	Nondep hallucinogen abuse NOS
SUD	E254.	Nondep hypnot/anxiolytic abuse
SUD	E2540	Nondep hypnot/anxio.abuse-unsp
SUD	E2541	Nondep hypnot/anxio.abuse-cont
SUD	E2542	Nondep hypnot/anxio.abuse-epis
SUD	E2543	Nondep hypn/anxio.abuse-in rem
SUD	E254z	Nondep hypnot/anxiol abuse NOS
SUD	E255.	Nondependent opioid abuse
SUD	E2550	Nondep opioid abuse - unspecif
SUD	E2551	Nondep opioid abuse - continuo
SUD	E2552	Nondep opioid abuse - episodic
SUD	E2553	Nondep opioid abuse - in remis
SUD	E255z	Nondependent opioid abuse NOS
SUD	E256.	Nondependent cocaine abuse
SUD	E2560	Nondep cocaine abuse - unspec.
SUD	E2561	Nondep cocaine abuse - contin.
SUD	E2562	Nondep cocaine abuse - episod.
SUD	E2563	Nondep cocaine abuse -in remis
SUD	E256z	Nondependent cocaine abuse NOS
SUD	E257.	Nondep amphetamine type abuse
SUD	E2570	Nondep amphet type abuse -unsp
SUD	E2571	Nondep amphet type abuse -cont
SUD	E2572	Nondep amphet type abuse -epis
SUD	E2573	Nondep amph. type abuse-in rem
SUD	E257z	Nondep amphet. type abuse NOS
SUD	E258.	Nondep antidepress type abuse
SUD	E2580	Nondep antidep type abuse-unsp
SUD	E2581	Nondep antidep type abuse-cont
SUD	E2582	Nondep antidep type abuse-epis
SUD	E2583	Nondep antidep tp abuse-in rem
SUD	E258z	Nondep antidep type abuse NOS
SUD	E259.	Nondependent mixed drug abuse
SUD	E2590	Nondep mixed drug abuse-unspec
SUD	E2591	Nondep mixed drug abuse-contin
SUD	E2592	Nondep mixed drug abuse-episod
SUD	E2593	Nondep mixed drug abuse-in rem
SUD	E2594	Misuse of prescription drugs
SUD	E259z	Nondep mixed drug abuse NOS
SUD	E25y.	Nondependent other drug abuse
SUD	E25y0	Nondep other drug abuse-unspec
SUD	E25y1	Nondep other drug abuse-contin
SUD	E25y2	Nondep other drug abuse-episod
SUD	E25y3	Nondep other drug abuse-in rem
SUD	E25yz	Nondep other drug abuse NOS
SUD	E25z.	Misuse of drugs NOS
SUD	F11x0	Cerebral degenerat.-alcoholism
SUD	F1440	Cerebellar ataxia-alcoholism
SUD	F25B.	Alcohol-induced epilepsy
SUD	F375.	Alcoholic polyneuropathy
SUD	F3941	Alcoholic myopathy
SUD	G555.	Alcoholic cardiomyopathy
SUD	G8523	Oes varic alcohol cirr liver
SUD	J153.	Alcoholic gastritis
SUD	J610.	Alcoholic fatty liver
SUD	J611.	Acute alcoholic hepatitis
SUD	J612.	Alcoholic cirrhosis of liver
SUD	J6120	Alcoholic fibrosis and scleros
SUD	J613.	Alcoholic liver damage unspec.
SUD	J6130	Alcoholic hepatic failure
SUD	J617.	Alcoholic hepatitis
SUD	J6170	Chronic alcoholic hepatitis
SUD	J6708	Alcohol-induced acute panc
SUD	J6710	Alcohol-ind chron pancreatitis
SUD	L183.	Pregnancy+drug dependence
SUD	L1830	Preg.+drug dependence unspecif
SUD	L1831	Preg.+drug dependence-deliver.
SUD	L1832	Preg.+drug depend-del+p/n comp
SUD	L1833	Preg.+drug depend-not deliver.
SUD	L1834	Preg.+drug depend.+p/n complic
SUD	L183z	Preg.+drug dependence NOS
SUD	L255.	Fetus+drug damage
SUD	L2550	Fetus+drug damage unspecified
SUD	L2551	Fetus+drug damage-delivered
SUD	L2552	Fetus+drug damage+a/n problem
SUD	L2553	Mat care,susp dam fet from alc
SUD	L255z	Fetus+drug damage NOS
SUD	R103.	[D]Alcohol blood level excess.
SUD	R10B0	[D]Finding of cocain in blood
SUD	R10B1	[D]Find hallucinogen in blood
SUD	R10B2	[D]Find psychotrop drug blood
SUD	R10B4	[D]Finding, opiate drug in bld
SUD	Ryu86	[X]Find ot drg addic poten,bld
SUD	SL50.	Opiate/narcotic poisoning
SUD	SL500	Unspecified opium poisoning
SUD	SL501	Heroin poisoning
SUD	SL502	Methadone poisoning
SUD	SL50z	Opiate/narcotic poisoning NOS
SUD	SL850	Cocaine poisoning
SUD	SL96.	Hallucinogen poisoning
SUD	SL960	Cannabis poisoning
SUD	SL961	Lysergide (LSD) poisoning
SUD	SL963	Mescaline poisoning
SUD	SL964	Psilocybin poisoning
SUD	SL96z	Hallucinogen poisoning NOS
SUD	SL97.	Psychostimulant poisoning
SUD	SL970	Amfetamine poisoning
SUD	SL972	Ecstasy poisoning
SUD	SL97z	Psychostimulant poisoning NOS
SUD	SLH3.	Alcohol deterrent poisoning
SUD	SM0..	Alcohol - toxic effect
SUD	SM00.	Ethyl alcohol - toxic effect
SUD	SM000	Ethanol - toxic effect
SUD	SM001	Denatured alcohol-toxic effect
SUD	SM002	Grain alcohol - toxic effect
SUD	SM00z	Ethyl alcohol-toxic effect NOS
SUD	SM01.	Methyl alcohol - toxic effect
SUD	SM010	Methanol - toxic effect
SUD	SM011	Wood alcohol - toxic effect
SUD	SM01z	Methyl alcohol-toxic eff.NOS
SUD	SM02.	Isopropyl alcohol-toxic effect
SUD	SM020	Dimethyl carbinol-toxic effect
SUD	SM021	Isopropanol - toxic effect
SUD	SM022	Rubbing alcohol - toxic effect
SUD	SM02z	Isopropyl alcohol-tox.eff.NOS
SUD	SM03.	Fusel oil - toxic effect
SUD	SM030	Amyl alcohol - toxic effect
SUD	SM031	Butyl alcohol - toxic effect
SUD	SM032	Propyl alcohol - toxic effect
SUD	SM03z	Fusel oil - toxic effect NOS
SUD	SM0y.	Other alcohol - toxic effect
SUD	SM0z.	Alcohol - toxic effect NOS
SUD	SyuFB	[X]Poisoning by other opioids
SUD	SyuFC	[X]Poisoning by oth synth narc
SUD	SyuFD	[X]Poisoning by oth/unsp narc
SUD	SyuFE	[X]Pois,oth/un psychodysl/hall
SUD	SyuG0	[X]Toxic eff of oth alcohols
SUD	T800.	Accid.pois.- heroin
SUD	T801.	Accid.pois.- methadone
SUD	T8023	Accid.pois.- opium
SUD	T841.	Accid.pois.- hallucinogens
SUD	T8410	Accid.pois.- cannabis derivat.
SUD	T8413	Accid.pois.- mescaline
SUD	T8414	Accid.pois.- psilocin
SUD	T8415	Accid.pois.- psilocybin
SUD	T842.	Accid.pois.- psychostimulants
SUD	T8420	Accid.pois.- amphetamine
SUD	T8520	Accid.pois.- cocaine
SUD	T900.	Accid.pois.- alcoholic drinks
SUD	T9010	Accid.pois.- denatured alcohol
SUD	T9011	Accid.pois.- methylated spirit
SUD	T902.	Accid.pois.- methyl alcohol
SUD	T903.	Accid.pois.- isopropyl alcohol
SUD	T9032	Accid.pois.- rubbing alc.subst
SUD	T904.	Accid.pois.- fusel oil
SUD	U1A5.	[X]Accident poisoning narcotic
SUD	U1A50	[X]Acc poison narcotic home
SUD	U1A51	[X]Ac pois narcotic res ins
SUD	U1A52	[X]Ac pois narcotic pub ins
SUD	U1A53	[X]Ac pois narcotic sport ar
SUD	U1A54	[X]Ac pois narcotic on hway
SUD	U1A55	[X]Ac pois narcotic trade ar
SUD	U1A56	[X]Ac pois narcotic indus ar
SUD	U1A57	[X]Ac pois narcotic on farm
SUD	U1A5y	[X]Ac pois narcotic OS place
SUD	U1A5z	[X]Ac pois narcotic unsp pl
SUD	U1A6.	[X]Acc poisoning hallucinogens
SUD	U1A60	[X]Acc poison hallucinog home
SUD	U1A61	[X]Ac pois hallucinog res ins
SUD	U1A62	[X]Ac pois hallucinog pub ins
SUD	U1A63	[X]Ac pois hallucinog sport ar
SUD	U1A64	[X]Ac pois hallucinog on hway
SUD	U1A65	[X]Ac pois hallucinog trade ar
SUD	U1A66	[X]Ac pois hallucinog indus ar
SUD	U1A67	[X]Ac pois hallucinog on farm
SUD	U1A6y	[X]Ac pois hallucinog OS place
SUD	U1A6z	[X]Ac pois hallucinog unsp pl
SUD	U1A9.	[X]Accid poisoning by alcohol
SUD	U1A90	[X]Acc poison alcohol home
SUD	U1A91	[X]Ac pois alcohol res instit
SUD	U1A92	[X]Ac pois alcohol pub instit
SUD	U1A93	[X]Ac pois alcohol sport area
SUD	U1A94	[X]Ac pois alcohol on highway
SUD	U1A95	[X]Ac pois alcohol trade area
SUD	U1A96	[X]Ac pois alcohol indust area
SUD	U1A97	[X]Ac pois alcohol on farm
SUD	U1A9y	[X]Ac pois alcohol OS place
SUD	U1A9z	[X]Ac pois alcohol unsp place
SUD	U205.	[X]Intent self poison narcotic
SUD	U2050	[X]Self pois narcotic home
SUD	U2051	[X]S/pois narcotic res ins
SUD	U2052	[X]S/pois narcotic pub ins
SUD	U2053	[X]S/pois narcotic sport ar
SUD	U2054	[X]S/pois narcotic on hway
SUD	U2055	[X]S/pois narcotic trade ar
SUD	U2056	[X]S/pois narcotic indus ar
SUD	U2057	[X]S/pois narcotic on farm
SUD	U205y	[X]S/pois narcotic OS place
SUD	U205z	[X]S/pois narcotic unsp pl
SUD	U206.	[X]Int s/poising hallucinogens
SUD	U2060	[X]Self pois hallucinog home
SUD	U2061	[X]S/pois hallucinog res ins
SUD	U2062	[X]S/pois hallucinog pub ins
SUD	U2063	[X]S/pois hallucinog sport ar
SUD	U2064	[X]S/pois hallucinog on hway
SUD	U2065	[X]S/pois hallucinog trade ar
SUD	U2066	[X]S/pois hallucinog indus ar
SUD	U2067	[X]S/pois hallucinog on farm
SUD	U206y	[X]S/pois hallucinog OS place
SUD	U206z	[X]S/pois hallucinog unsp pl
SUD	U209.	[X]Self poisoning by alcohol
SUD	U2090	[X]Self pois alcohol home
SUD	U2091	[X]S/pois alcohol res instit
SUD	U2092	[X]S/pois alcohol pub instit
SUD	U2093	[X]S/pois alcohol sport area
SUD	U2094	[X]S/pois alcohol on highway
SUD	U2095	[X]S/pois alcohol trade area
SUD	U2096	[X]S/pois alcohol indust area
SUD	U2097	[X]S/pois alcohol on farm
SUD	U209y	[X]S/pois alcohol OS place
SUD	U209z	[X]S/pois alcohol unsp place
SUD	U405.	[X]Poisoning ?intent narcotic
SUD	U4050	[X]Pois ?intent narcotic home
SUD	U4051	[X]Pois ?int narcotic resid
SUD	U4052	[X]Pois ?int narcotic pub ins
SUD	U4053	[X]Pois ?int narcotic sport ar
SUD	U4054	[X]Pois ?int narcotic on hway
SUD	U4055	[X]Pois ?int narcotic trade ar
SUD	U4056	[X]Pois ?int narcotic indus ar
SUD	U4057	[X]Pois ?int narcotic on farm
SUD	U405y	[X]Pois ?int narcotic OS place
SUD	U405z	[X]Pois ?int narcotic unsp pl
SUD	U406.	[X]Poison ?intent hallucinogen
SUD	U4060	[X]Pois ?intent hallucin home
SUD	U4061	[X]Pois ?int hallucinog resid
SUD	U4062	[X]Pois ?int hallucin pub ins
SUD	U4063	[X]Pois ?int hallucin sport ar
SUD	U4064	[X]Pois ?int hallucin on hway
SUD	U4065	[X]Pois ?int hallucin trade ar
SUD	U4066	[X]Pois ?int hallucin indus ar
SUD	U4067	[X]Pois ?int hallucin on farm
SUD	U406y	[X]Pois ?int hallucin OS place
SUD	U406z	[X]Pois ?int hallucin unsp pl
SUD	U409.	[X]Poisoning ?intent alcohol
SUD	U4090	[X]Poison ?intent alcohol home
SUD	U4091	[X]Pois ?int alcohol res ins
SUD	U4092	[X]Pois ?int alcohol pub inst
SUD	U4093	[X]Pois ?int alcohol sport ar
SUD	U4094	[X]Pois ?int alcohol on hway
SUD	U4095	[X]Pois ?int alcohol trade ar
SUD	U4096	[X]Pois ?int alcohol indust ar
SUD	U4097	[X]Pois ?intent alcoh on farm
SUD	U409y	[X]Pois ?int alcohol OS place
SUD	U409z	[X]Pois ?int alcohol unsp plc
SUD	U60H3	[X]Alcohol deterrents adv eff
SUD	U804.	[X]Evid alc inv,80-99mg/100ml
SUD	U805.	[X]Ev alc inv,100-119mg/100ml
SUD	U806.	[X]Ev alc inv,120-199mg/100ml
SUD	U807.	[X]Ev alc inv,200-239mg/100ml
SUD	U808.	[X]Evid alc inv,240mg/100ml+
SUD	U812.	[X]Evid alc inv,severe intoxic
SUD	U813.	[X]Evid alc inv,very sev intox
SUD	ZV113	[V]PH - Alcoholism
SUD	ZV114	[V]Pers hist subst abuse
SUD	ZV4K1	[V]Drug use
SUD	ZV57A	[V]Alcohol rehabilitation
SUD	ZV6D6	[V]Alcohl abus counsel+surveil
SUD	ZV6D7	[V]Drug abuse counsel+surveiln

## Sheet: ICD-10 MD
GROUP_NAME	CODE_VALUE	CODE_NAME
ADHD	F90	Hyperkinetic disorders
ADHD	F900	Disturbance of activity and attention
ADHD	F901	Hyperkinetic conduct disorder
ADHD	F908	Other hyperkinetic disorders
ADHD	F909	Hyperkinetic disorder, unspecified
ANX	F40	Phobic anxiety disorders
ANX	F400	Agoraphobia
ANX	F401	Social phobias
ANX	F402	Specific (isolated) phobias
ANX	F408	Other phobic anxiety disorders
ANX	F409	Phobic anxiety disorder, unspecified
ANX	F41	Other anxiety disorders
ANX	F410	Panic disorder [episodic paroxysmal anxiety]
ANX	F411	Generalized anxiety disorder
ANX	F412	Mixed anxiety and depressive disorder
ANX	F413	Other mixed anxiety disorders
ANX	F418	Other specified anxiety disorders
ANX	F419	Anxiety disorder, unspecified
ANX	F42	Obsessive-compulsive disorder
ANX	F420	Predominantly obsessional thoughts or ruminations
ANX	F421	Predominantly compulsive acts [obsessional rituals]
ANX	F422	Mixed obsessional thoughts and acts
ANX	F428	Other obsessive-compulsive disorders
ANX	F429	Obsessive-compulsive disorder, unspecified
ANX	F930	Separation anxiety disorder of childhood
ANX	F931	Phobic anxiety disorder of childhood
ANX	F932	Social anxiety disorder of childhood
ASD	F840	Childhood autism
ASD	F841	Atypical autism
ASD	F842	Rett syndrome
ASD	F843	Other childhood disintegrative disorder
ASD	F844	Overactive disorder associated with mental retardation and stereotyped movements
ASD	F845	Asperger syndrome
ASD	F848	Other pervasive developmental disorders
ASD	F849	Pervasive developmental disorder, unspecified
CON	F901	Hyperkinetic conduct disorder
CON	F91	Conduct disorders
CON	F910	Conduct disorder confined to the family context
CON	F911	Unsocialized conduct disorder
CON	F912	Socialized conduct disorder
CON	F913	Oppositional defiant disorder
CON	F918	Other conduct disorders
CON	F919	Conduct disorder, unspecified
CON	F92	Mixed disorders of conduct and emotions
CON	F920	Depressive conduct disorder
CON	F928	Other mixed disorders of conduct and emotions
CON	F929	Mixed disorder of conduct and emotions, unspecified
DEP	F32	Depressive episode
DEP	F320	Mild depressive episode
DEP	F321	Moderate depressive episode
DEP	F322	Severe depressive episode without psychotic symptoms
DEP	F328	Other depressive episodes
DEP	F329	Depressive episode, unspecified
DEP	F33	Recurrent depressive disorder
DEP	F330	Recurrent depressive disorder, current episode mild
DEP	F331	Recurrent depressive disorder, current episode moderate
DEP	F332	Recurrent depressive disorder, current episode severe without psychotic symptoms
DEP	F334	Recurrent depressive disorder, currently in remission
DEP	F338	Other recurrent depressive disorders
DEP	F339	Recurrent depressive disorder, unspecified
DEP	F341	Dysthymia
DEP	F412	Mixed anxiety and depressive disorder
EAT	F50	Eating disorders
EAT	F500	Anorexia nervosa
EAT	F501	Atypical anorexia nervosa
EAT	F502	Bulimia nervosa
EAT	F503	Atypical bulimia nervosa
EAT	F509	Eating disorder, unspecified
EAT	F982	Feeding disorder of infancy and childhood
LEARN	F80	Specific developmental disorders of speech and language
LEARN	F800	Specific speech articulation disorder
LEARN	F801	Expressive language disorder
LEARN	F809	Developmental disorder of speech and language, unspecified
LEARN	F81	Specific developmental disorders of scholastic skills
LEARN	F810	Specific reading disorder
LEARN	F811	Specific spelling disorder
LEARN	F812	Specific disorder of arithmetical skills
LEARN	F813	Mixed disorder of scholastic skills
LEARN	F818	Other developmental disorders of scholastic skills
LEARN	F819	Developmental disorder of scholastic skills, unspecified
LEARN	F82	Specific developmental disorder of motor function
LEARN	F83	Mixed specific developmental disorders
LEARN	R48	Dyslexia and other symbolic dysfunctions, not elsewhere classified
LEARN	R480	Dyslexia and alexia
SMI	F20	Schizophrenia
SMI	F200	Paranoid schizophrenia
SMI	F201	Hebephrenic schizophrenia
SMI	F202	Catatonic schizophrenia
SMI	F203	Undifferentiated schizophrenia
SMI	F204	Post-schizophrenic depression
SMI	F205	Residual schizophrenia
SMI	F206	Simple schizophrenia
SMI	F208	Other schizophrenia
SMI	F209	Schizophrenia, unspecified
SMI	F21	Schizotypal disorder
SMI	F21X	Schizotypal disorder
SMI	F22	Persistent delusional disorders
SMI	F220	Delusional disorder
SMI	F228	Other persistent delusional disorders
SMI	F229	Persistent delusional disorder, unspecified
SMI	F23	Acute and transient psychotic disorders
SMI	F230	Acute polymorphic psychotic disorder without symptoms of schizophrenia
SMI	F231	Acute polymorphic psychotic disorder with symptoms of schizophrenia
SMI	F232	Acute schizophrenia-like psychotic disorder
SMI	F233	Other acute predominantly delusional psychotic disorders
SMI	F238	Other acute and transient psychotic disorders
SMI	F239	Acute and transient psychotic disorder, unspecified
SMI	F24	Induced delusional disorder
SMI	F24X	Induced delusional disorder
SMI	F25	Schizoaffective disorders
SMI	F250	Schizoaffective disorder, manic type
SMI	F251	Schizoaffective disorder, depressive type
SMI	F252	Schizoaffective disorder, mixed type
SMI	F258	Other schizoaffective disorders
SMI	F259	Schizoaffective disorder, unspecified
SMI	F28	Other nonorganic psychotic disorders
SMI	F28X	Other nonorganic psychotic disorders
SMI	F29	Unspecified nonorganic psychosis
SMI	F29X	Unspecified nonorganic psychosis
SMI	F30	Manic episode
SMI	F300	Hypomania
SMI	F301	Mania without psychotic symptoms
SMI	F302	Mania with psychotic symptoms
SMI	F308	Other manic episodes
SMI	F309	Manic episode, unspecified
SMI	F31	Bipolar affective disorder
SMI	F310	Bipolar affective disorder, current episode hypomanic
SMI	F311	Bipolar affective disorder, current episode manic without psychotic symptoms
SMI	F312	Bipolar affective disorder, current episode manic with psychotic symptoms
SMI	F313	Bipolar affective disorder, current episode mild or moderate depression
SMI	F314	Bipolar affective disorder, current episode severe depression without psychotic symptoms
SMI	F315	Bipolar affective disorder, current episode severe depression with psychotic symptoms
SMI	F316	Bipolar affective disorder, current episode mixed
SMI	F317	Bipolar affective disorder, currently in remission
SMI	F318	Other bipolar affective disorders
SMI	F319	Bipolar affective disorder, unspecified
SMI	F323	Severe depressive episode with psychotic symptoms
SMI	F333	Recurrent depressive disorder, current episode severe with psychotic symptoms
SMI	F38	Other mood [affective] disorders
SMI	F380	Other single mood [affective] disorders
SMI	F381	Other recurrent mood [affective] disorders
SMI	F388	Other specified mood [affective] disorders
SMI	F39	Unspecified mood [affective] disorder
SMI	F39X	Unspecified mood [affective] disorder

## Sheet: ICD-10 SUD AND DD
GROUP_NAME	CODE_VALUE	CODE_NAME
CC	F10	Mental and behavioural disorders due to use of alcohol
CC	F100	Mental and behavioural disorders due to use of alcohol
CC	F101	Mental and behavioural disorders due to use of alcohol
CC	F102	Mental and behavioural disorders due to use of alcohol
CC	F103	Mental and behavioural disorders due to use of alcohol
CC	F104	Mental and behavioural disorders due to use of alcohol
CC	F105	Mental and behavioural disorders due to use of alcohol
CC	F106	Mental and behavioural disorders due to use of alcohol
CC	F107	Mental and behavioural disorders due to use of alcohol
CC	F108	Mental and behavioural disorders due to use of alcohol
CC	F109	Mental and behavioural disorders due to use of alcohol
CC	F11	Mental and behavioural disorders due to use of opioids
CC	F110	Mental and behavioural disorders due to use of opioids
CC	F111	Mental and behavioural disorders due to use of opioids
CC	F112	Mental and behavioural disorders due to use of opioids
CC	F113	Mental and behavioural disorders due to use of opioids
CC	F114	Mental and behavioural disorders due to use of opioids
CC	F115	Mental and behavioural disorders due to use of opioids
CC	F116	Mental and behavioural disorders due to use of opioids
CC	F117	Mental and behavioural disorders due to use of opioids
CC	F118	Mental and behavioural disorders due to use of opioids
CC	F119	Mental and behavioural disorders due to use of opioids
CC	F12	Mental and behavioural disorders due to use of cannabinoids
CC	F120	Mental and behavioural disorders due to use of cannabinoids
CC	F121	Mental and behavioural disorders due to use of cannabinoids
CC	F122	Mental and behavioural disorders due to use of cannabinoids
CC	F123	Mental and behavioural disorders due to use of cannabinoids
CC	F124	Mental and behavioural disorders due to use of cannabinoids
CC	F125	Mental and behavioural disorders due to use of cannabinoids
CC	F126	Mental and behavioural disorders due to use of cannabinoids
CC	F127	Mental and behavioural disorders due to use of cannabinoids
CC	F128	Mental and behavioural disorders due to use of cannabinoids
CC	F129	Mental and behavioural disorders due to use of cannabinoids
CC	F13	Mental and behavioural disorders due to use of sedatives or hypnotics
CC	F130	Mental and behavioural disorders due to use of sedatives or hypnotics
CC	F131	Mental and behavioural disorders due to use of sedatives or hypnotics
CC	F132	Mental and behavioural disorders due to use of sedatives or hypnotics
CC	F133	Mental and behavioural disorders due to use of sedatives or hypnotics
CC	F134	Mental and behavioural disorders due to use of sedatives or hypnotics
CC	F135	Mental and behavioural disorders due to use of sedatives or hypnotics
CC	F136	Mental and behavioural disorders due to use of sedatives or hypnotics
CC	F137	Mental and behavioural disorders due to use of sedatives or hypnotics
CC	F138	Mental and behavioural disorders due to use of sedatives or hypnotics
CC	F139	Mental and behavioural disorders due to use of sedatives or hypnotics
CC	F14	Mental and behavioural disorders due to use of cocaine
CC	F140	Mental and behavioural disorders due to use of cocaine
CC	F141	Mental and behavioural disorders due to use of cocaine
CC	F142	Mental and behavioural disorders due to use of cocaine
CC	F143	Mental and behavioural disorders due to use of cocaine
CC	F144	Mental and behavioural disorders due to use of cocaine
CC	F145	Mental and behavioural disorders due to use of cocaine
CC	F146	Mental and behavioural disorders due to use of cocaine
CC	F147	Mental and behavioural disorders due to use of cocaine
CC	F148	Mental and behavioural disorders due to use of cocaine
CC	F149	Mental and behavioural disorders due to use of cocaine
CC	F15	Mental and behavioural disorders due to use of other stimulants, including caffeine
CC	F150	Mental and behavioural disorders due to use of other stimulants, including caffeine
CC	F151	Mental and behavioural disorders due to use of other stimulants, including caffeine
CC	F152	Mental and behavioural disorders due to use of other stimulants, including caffeine
CC	F153	Mental and behavioural disorders due to use of other stimulants, including caffeine
CC	F154	Mental and behavioural disorders due to use of other stimulants, including caffeine
CC	F155	Mental and behavioural disorders due to use of other stimulants, including caffeine
CC	F156	Mental and behavioural disorders due to use of other stimulants, including caffeine
CC	F157	Mental and behavioural disorders due to use of other stimulants, including caffeine
CC	F158	Mental and behavioural disorders due to use of other stimulants, including caffeine
CC	F159	Mental and behavioural disorders due to use of other stimulants, including caffeine
CC	F16	Mental and behavioural disorders due to use of hallucinogens
CC	F160	Mental and behavioural disorders due to use of hallucinogens
CC	F161	Mental and behavioural disorders due to use of hallucinogens
CC	F162	Mental and behavioural disorders due to use of hallucinogens
CC	F163	Mental and behavioural disorders due to use of hallucinogens
CC	F164	Mental and behavioural disorders due to use of hallucinogens
CC	F165	Mental and behavioural disorders due to use of hallucinogens
CC	F166	Mental and behavioural disorders due to use of hallucinogens
CC	F167	Mental and behavioural disorders due to use of hallucinogens
CC	F168	Mental and behavioural disorders due to use of hallucinogens
CC	F169	Mental and behavioural disorders due to use of hallucinogens
CC	F18	Mental and behavioural disorders due to use of volatile solvents
CC	F180	Mental and behavioural disorders due to use of volatile solvents
CC	F181	Mental and behavioural disorders due to use of volatile solvents
CC	F182	Mental and behavioural disorders due to use of volatile solvents
CC	F183	Mental and behavioural disorders due to use of volatile solvents
CC	F184	Mental and behavioural disorders due to use of volatile solvents
CC	F185	Mental and behavioural disorders due to use of volatile solvents
CC	F186	Mental and behavioural disorders due to use of volatile solvents
CC	F187	Mental and behavioural disorders due to use of volatile solvents
CC	F188	Mental and behavioural disorders due to use of volatile solvents
CC	F189	Mental and behavioural disorders due to use of volatile solvents
CC	F19	Mental and behavioural disorders due to multiple drug use and use of other psychoactive substances
CC	F190	Mental and behavioural disorders due to multiple drug use and use of other psychoactive substances
CC	F191	Mental and behavioural disorders due to multiple drug use and use of other psychoactive substances
CC	F192	Mental and behavioural disorders due to multiple drug use and use of other psychoactive substances
CC	F193	Mental and behavioural disorders due to multiple drug use and use of other psychoactive substances
CC	F194	Mental and behavioural disorders due to multiple drug use and use of other psychoactive substances
CC	F195	Mental and behavioural disorders due to multiple drug use and use of other psychoactive substances
CC	F196	Mental and behavioural disorders due to multiple drug use and use of other psychoactive substances
CC	F197	Mental and behavioural disorders due to multiple drug use and use of other psychoactive substances
CC	F198	Mental and behavioural disorders due to multiple drug use and use of other psychoactive substances
CC	F199	Mental and behavioural disorders due to multiple drug use and use of other psychoactive substances
SUD	E244	Alcohol-induced pseudo-Cushings syndrome
SUD	E512	Wernickes encephalopathy
SUD	G312	Degeneration of nervous system due to alcohol
SUD	G621	Alcoholic polyneuropathy
SUD	G721	Alcoholic myopathy
SUD	I426	Alcoholic cardiomyopathy
SUD	K292	Alcoholic gastritis
SUD	K70	Alcoholic liver disease
SUD	K700	Alcoholic fatty liver
SUD	K701	Alcoholic hepatitis
SUD	K702	Alcoholic fibrosis and sclerosis of liver
SUD	K703	Alcoholic cirrhosis of liver
SUD	K704	Alcoholic hepatic failure
SUD	K709	Alcoholic liver disease, unspecified
SUD	K852	Alcohol-induced acute pancreatitis
SUD	K860	Alcohol-induced chronic pancreatitis
SUD	O354	Maternal care for (suspected) damage to fetus from alcohol
SUD	O355	Maternal care for (suspected) damage to fetus by drugs
SUD	R781	Finding of opiate drug in blood
SUD	R782	Finding of cocaine in blood
SUD	R783	Finding of hallucinogen in blood
SUD	R784	Finding of other drugs of addictive potential in blood
SUD	R785	Finding of psychotropic drug in blood
SUD	T40	Poisoning by narcotics and psychodysleptics [hallucinogens]
SUD	T400	Poisoning: Opium
SUD	T401	Poisoning: Heroin
SUD	T402	Poisoning: Other opioids
SUD	T403	Poisoning: Methadone
SUD	T404	Poisoning: Other synthetic narcotics
SUD	T405	Poisoning: Cocaine
SUD	T406	Poisoning: Other and unspecified narcotics
SUD	T407	Poisoning: Cannabis (derivatives)
SUD	T408	Poisoning: Lysergide [LSD]
SUD	T409	Poisoning: Other and unspecified psychodysleptics [hallucinogens]
SUD	T436	Poisoning: Psychostimulants with abuse potential
SUD	T51	Toxic effect of alcohol
SUD	T510	Toxic effect: Ethanol
SUD	T511	Toxic effect: Methanol
SUD	T512	Toxic effect: 2-Propanol
SUD	T513	Toxic effect: Fusel oil
SUD	T518	Toxic effect: Other alcohols
SUD	T519	Toxic effect: Alcohol, unspecified
SUD	X42	Accidental poisoning by and exposure to narcotics and psychodysleptics [hallucinogens], not elsewhere classified
SUD	X420	Accidental poisoning by and exposure to narcotics and psychodysleptics [hallucinogens], not elsewhere classified
SUD	X421	Accidental poisoning by and exposure to narcotics and psychodysleptics [hallucinogens], not elsewhere classified
SUD	X422	Accidental poisoning by and exposure to narcotics and psychodysleptics [hallucinogens], not elsewhere classified
SUD	X423	Accidental poisoning by and exposure to narcotics and psychodysleptics [hallucinogens], not elsewhere classified
SUD	X424	Accidental poisoning by and exposure to narcotics and psychodysleptics [hallucinogens], not elsewhere classified
SUD	X425	Accidental poisoning by and exposure to narcotics and psychodysleptics [hallucinogens], not elsewhere classified
SUD	X426	Accidental poisoning by and exposure to narcotics and psychodysleptics [hallucinogens], not elsewhere classified
SUD	X427	Accidental poisoning by and exposure to narcotics and psychodysleptics [hallucinogens], not elsewhere classified
SUD	X428	Accidental poisoning by and exposure to narcotics and psychodysleptics [hallucinogens], not elsewhere classified
SUD	X429	Accidental poisoning by and exposure to narcotics and psychodysleptics [hallucinogens], not elsewhere classified
SUD	X45	Accidental poisoning by and exposure to alcohol
SUD	X450	Accidental poisoning by and exposure to alcohol
SUD	X451	Accidental poisoning by and exposure to alcohol
SUD	X452	Accidental poisoning by and exposure to alcohol
SUD	X453	Accidental poisoning by and exposure to alcohol
SUD	X454	Accidental poisoning by and exposure to alcohol
SUD	X455	Accidental poisoning by and exposure to alcohol
SUD	X456	Accidental poisoning by and exposure to alcohol
SUD	X457	Accidental poisoning by and exposure to alcohol
SUD	X458	Accidental poisoning by and exposure to alcohol
SUD	X459	Accidental poisoning by and exposure to alcohol
SUD	X62	Intentional self-poisoning by and exposure to narcotics and psychodysleptics [hallucinogens], not elsewhere classified
SUD	X620	Intentional self-poisoning by and exposure to narcotics and psychodysleptics [hallucinogens], not elsewhere classified
SUD	X621	Intentional self-poisoning by and exposure to narcotics and psychodysleptics [hallucinogens], not elsewhere classified
SUD	X622	Intentional self-poisoning by and exposure to narcotics and psychodysleptics [hallucinogens], not elsewhere classified
SUD	X623	Intentional self-poisoning by and exposure to narcotics and psychodysleptics [hallucinogens], not elsewhere classified
SUD	X624	Intentional self-poisoning by and exposure to narcotics and psychodysleptics [hallucinogens], not elsewhere classified
SUD	X625	Intentional self-poisoning by and exposure to narcotics and psychodysleptics [hallucinogens], not elsewhere classified
SUD	X626	Intentional self-poisoning by and exposure to narcotics and psychodysleptics [hallucinogens], not elsewhere classified
SUD	X627	Intentional self-poisoning by and exposure to narcotics and psychodysleptics [hallucinogens], not elsewhere classified
SUD	X628	Intentional self-poisoning by and exposure to narcotics and psychodysleptics [hallucinogens], not elsewhere classified
SUD	X629	Intentional self-poisoning by and exposure to narcotics and psychodysleptics [hallucinogens], not elsewhere classified
SUD	X65	Intentional self-poisoning by and exposure to alcohol
SUD	X650	Intentional self-poisoning by and exposure to alcohol
SUD	X651	Intentional self-poisoning by and exposure to alcohol
SUD	X652	Intentional self-poisoning by and exposure to alcohol
SUD	X653	Intentional self-poisoning by and exposure to alcohol
SUD	X654	Intentional self-poisoning by and exposure to alcohol
SUD	X655	Intentional self-poisoning by and exposure to alcohol
SUD	X656	Intentional self-poisoning by and exposure to alcohol
SUD	X657	Intentional self-poisoning by and exposure to alcohol
SUD	X658	Intentional self-poisoning by and exposure to alcohol
SUD	X659	Intentional self-poisoning by and exposure to alcohol
SUD	Y12	Poisoning by and exposure to narcotics and psychodysleptics [hallucinogens], not elsewhere classified, undetermined intent
SUD	Y120	Poisoning by and exposure to narcotics and psychodysleptics [hallucinogens], not elsewhere classified, undetermined intent
SUD	Y121	Poisoning by and exposure to narcotics and psychodysleptics [hallucinogens], not elsewhere classified, undetermined intent
SUD	Y122	Poisoning by and exposure to narcotics and psychodysleptics [hallucinogens], not elsewhere classified, undetermined intent
SUD	Y123	Poisoning by and exposure to narcotics and psychodysleptics [hallucinogens], not elsewhere classified, undetermined intent
SUD	Y124	Poisoning by and exposure to narcotics and psychodysleptics [hallucinogens], not elsewhere classified, undetermined intent
SUD	Y125	Poisoning by and exposure to narcotics and psychodysleptics [hallucinogens], not elsewhere classified, undetermined intent
SUD	Y126	Poisoning by and exposure to narcotics and psychodysleptics [hallucinogens], not elsewhere classified, undetermined intent
SUD	Y127	Poisoning by and exposure to narcotics and psychodysleptics [hallucinogens], not elsewhere classified, undetermined intent
SUD	Y128	Poisoning by and exposure to narcotics and psychodysleptics [hallucinogens], not elsewhere classified, undetermined intent
SUD	Y129	Poisoning by and exposure to narcotics and psychodysleptics [hallucinogens], not elsewhere classified, undetermined intent
SUD	Y15	Poisoning by and exposure to alcohol, undetermined intent
SUD	Y150	Poisoning by and exposure to alcohol, undetermined intent
SUD	Y151	Poisoning by and exposure to alcohol, undetermined intent
SUD	Y152	Poisoning by and exposure to alcohol, undetermined intent
SUD	Y153	Poisoning by and exposure to alcohol, undetermined intent
SUD	Y154	Poisoning by and exposure to alcohol, undetermined intent
SUD	Y155	Poisoning by and exposure to alcohol, undetermined intent
SUD	Y156	Poisoning by and exposure to alcohol, undetermined intent
SUD	Y157	Poisoning by and exposure to alcohol, undetermined intent
SUD	Y158	Poisoning by and exposure to alcohol, undetermined intent
SUD	Y159	Poisoning by and exposure to alcohol, undetermined intent
SUD	Y573	Alcohol deterrents
SUD	Y904	Blood alcohol level of 80-99 mg/100 ml
SUD	Y905	Blood alcohol level of 100-119 mg/100 ml
SUD	Y906	Blood alcohol level of 120-199 mg/100 ml
SUD	Y907	Blood alcohol level of 200-239 mg/100 ml
SUD	Y908	Blood alcohol level of 240 mg/100 ml or more
SUD	Y912	Severe alcohol intoxication
SUD	Y913	Very severe alcohol intoxication
SUD	Z502	Alcohol rehabilitation
SUD	Z503	Drug rehabilitation
SUD	Z714	Alcohol abuse counselling and surveillance
SUD	Z715	Drug abuse counselling and surveillance
SUD	Z721	Alcohol use
SUD	Z722	Drug use
